# Supplementary material for: Biphasic Oxygen-Regulating Cyanobacterial Hydrogel for Synergistic Ischemic Stroke Gas Therapy and Post-Stroke Depression Prevention
Source: Research Square preprint supplement (doi:10.21203/rs.3.rs-8221931/v1), 2025-12-12
Supplement: Supplementary file 1 [file 20eccdb5b47e7b66f0f49d0c.docx]

Supporting Information

**Biphasic Oxygen-Regulating Cyanobacterial Hydrogel for Synergistic Ischemic Stroke Gas Therapy and Post-Stroke Depression Prevention**

Haoxin Cheng, Haihua Yang, Hongmei Liu, Yihan Luo, Zhihao Zhou, Mengzhen Zhao, Chao Wang, Zhiyan Xiong, Shichen Liu*, and Xiaolei Wang*


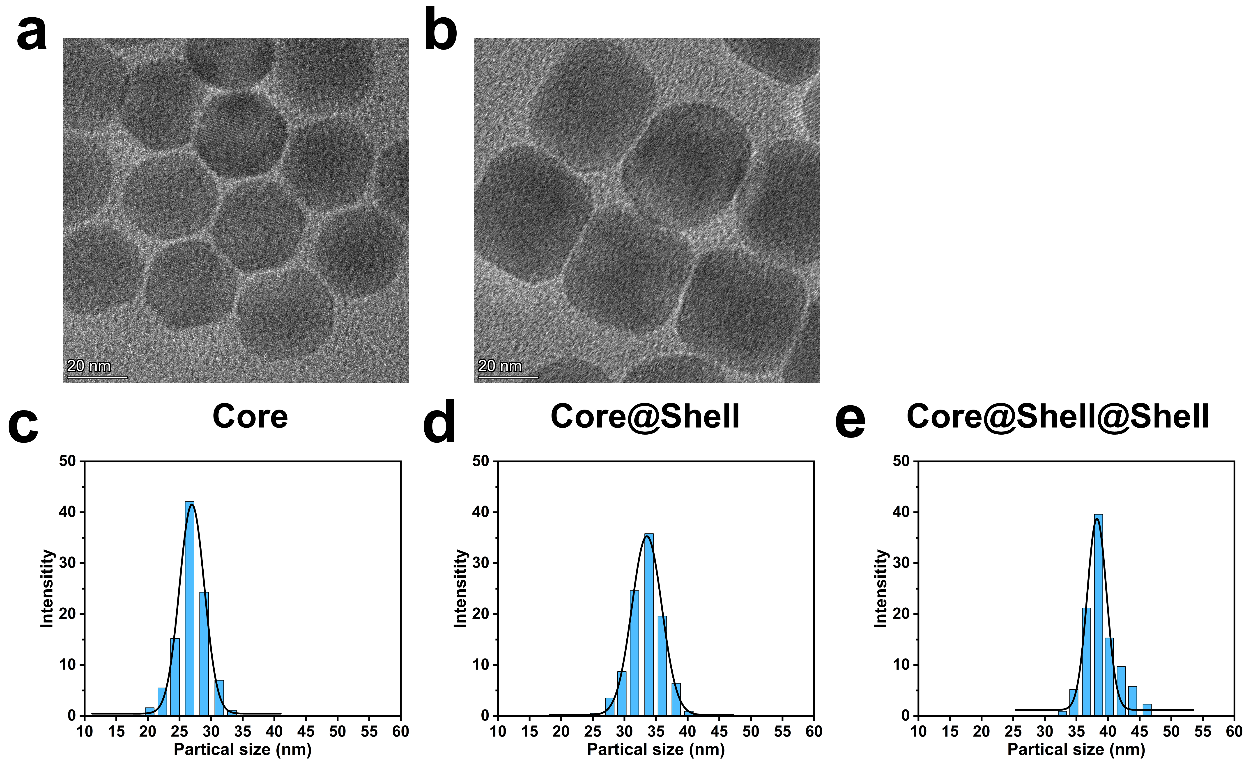


**Figure S1.** TEM images of (a) core and (b) core@shell upconversion nanocrystals. Partical size distributions of (c) core, (d) core@shell and (e) core@shell@shell upconversion nanocrystals.


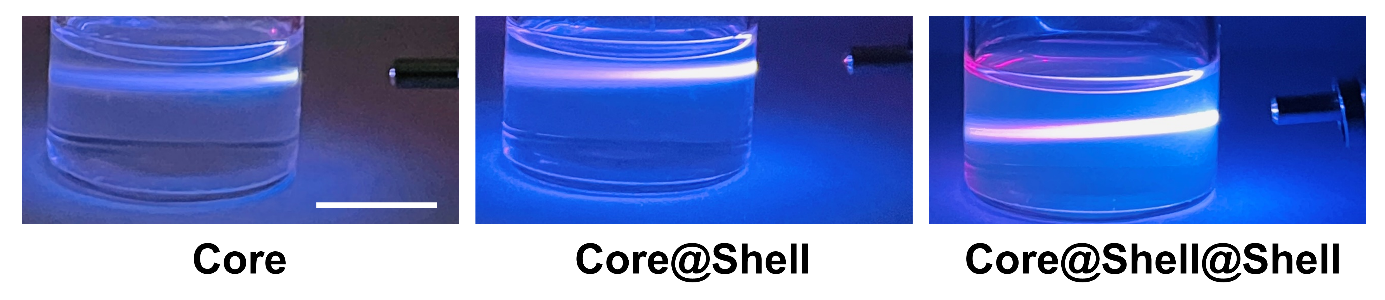


**Figure S2.** The photographs of UCNPs excited by 980 nm NIR. Scale bar = 1 cm.


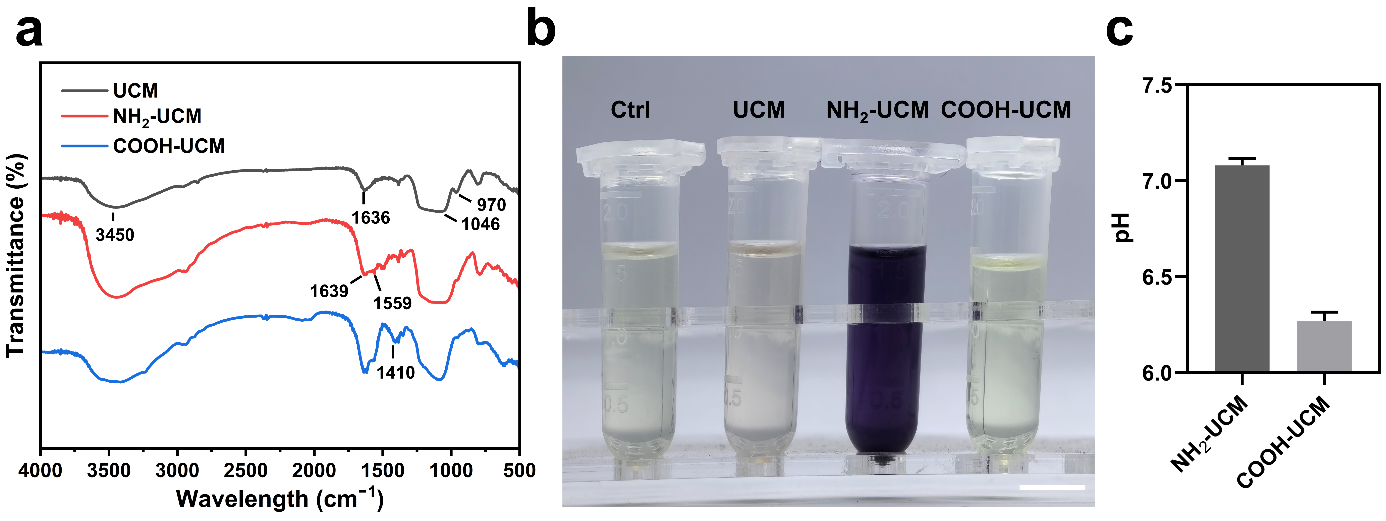


**Figure S3.** a) FT-IR spectra of UCM, NH2-UCM and COOH-UCM. b) The ninhydrin reaction of UCM, NH2-UCM and COOH-UCM. Scale bar = 0.5 cm. c) pH of NH2-UCM and COOH-UCM in aqueous solution at 1 mg·mL−1. Data are means ± s.d. (n = 3).


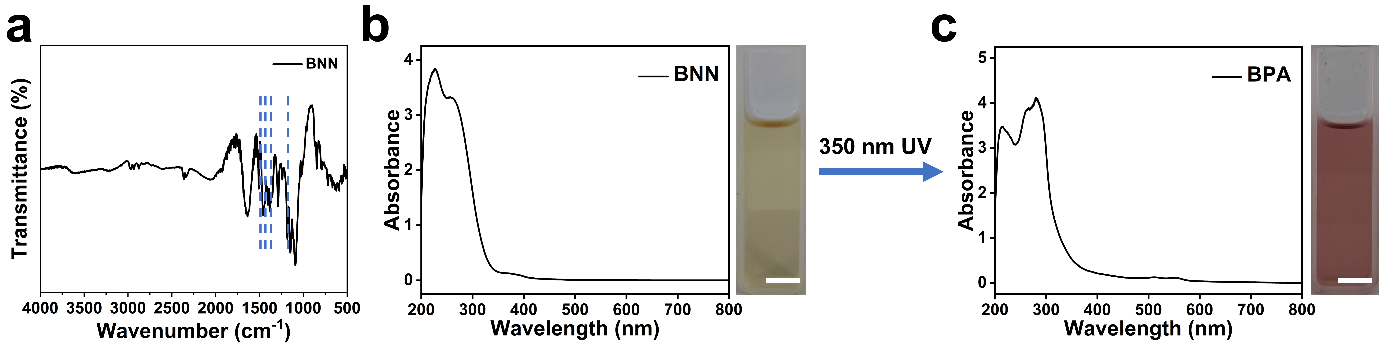


**Figure S4.** a) FT-IR spectrum of BNN. b) UV-visible spectrum and photograph of BNN. c) UV-visible spectrum and photograph of BNN irradiated by 350 nm ultraviolet light. Scale bar = 0.5 cm.


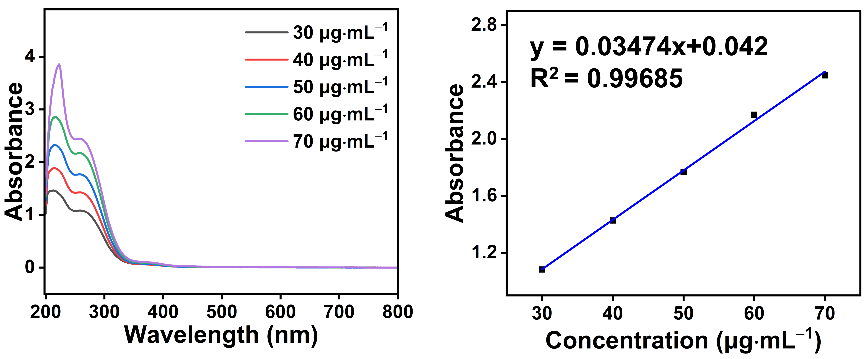


**Figure S5.** UV-visible spectra and standard curves of BNN.


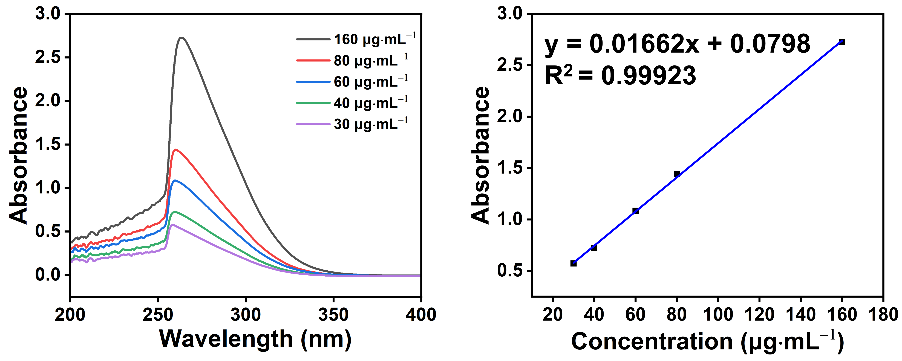


**Figure S6.** UV-visible spectra and standard curves of DATS.


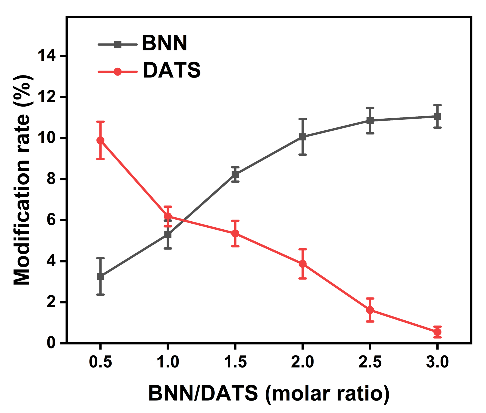


**Figure S7.** Modification rates of BNN and DATS at different molar ratios. Data are means ± s.d. (n = 3).


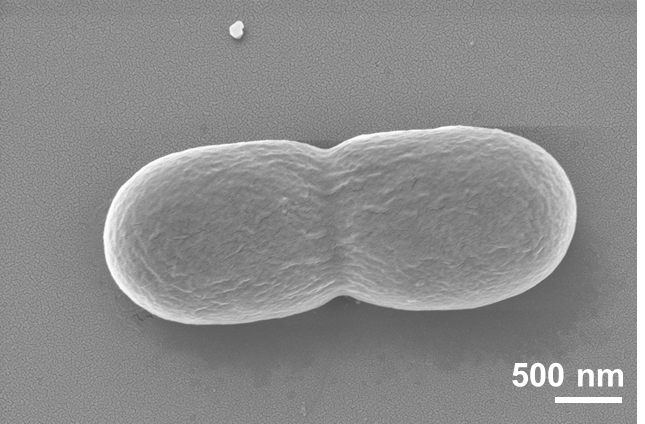


**Figure S8.** The SEM image of cyanobacteria.


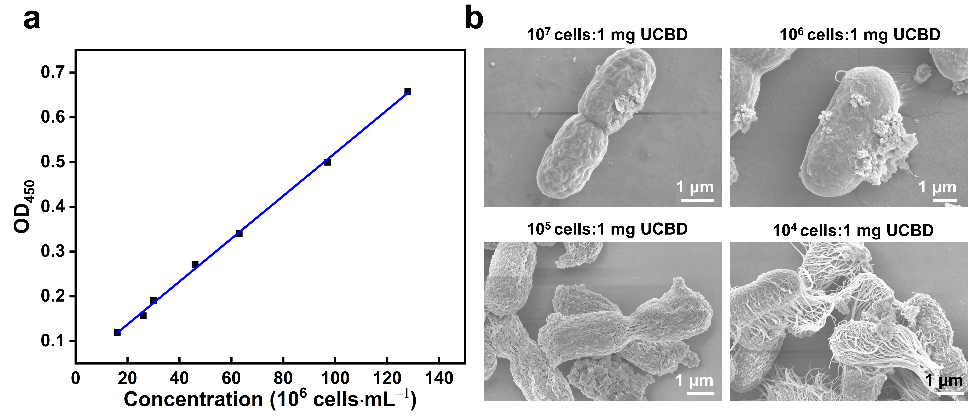


**Figure S9.** a) Standard curves of Cya. b) SEM images of different synthesis ratios of CUCBD.


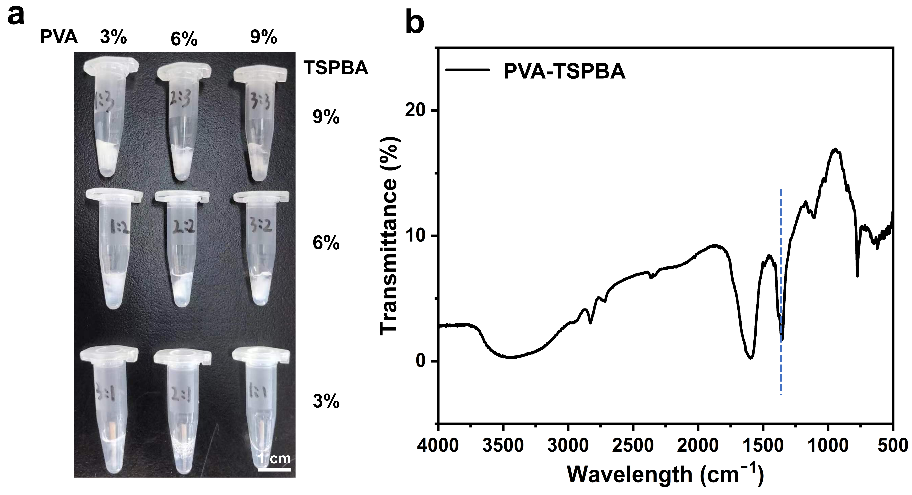


**Figure S10.** a) Gelation of PVA and TSPBA at various concentrations and ratios. b) FT-IR spectrum of PVA-TSPBA.


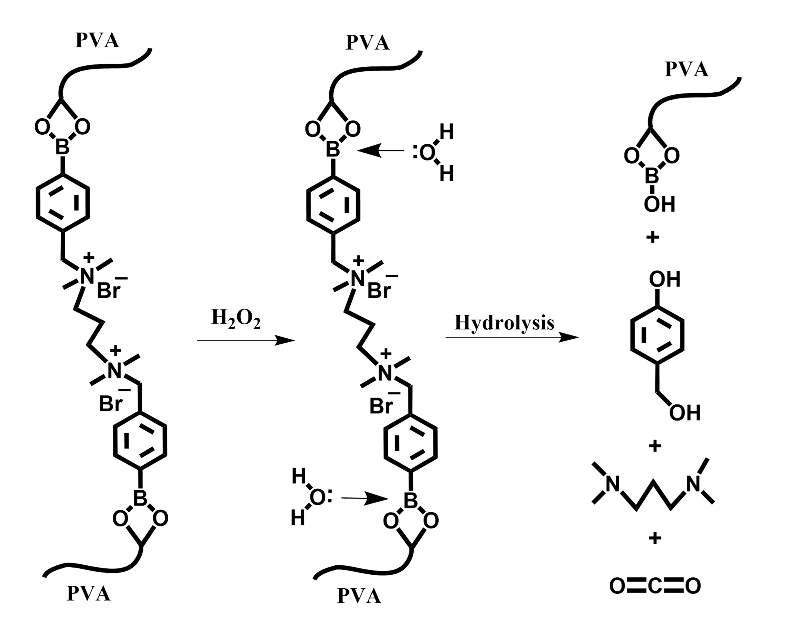


**Figure S11.** Schematic of the H2O2-responsiveness mechanism of PVA-TSPBA gels.


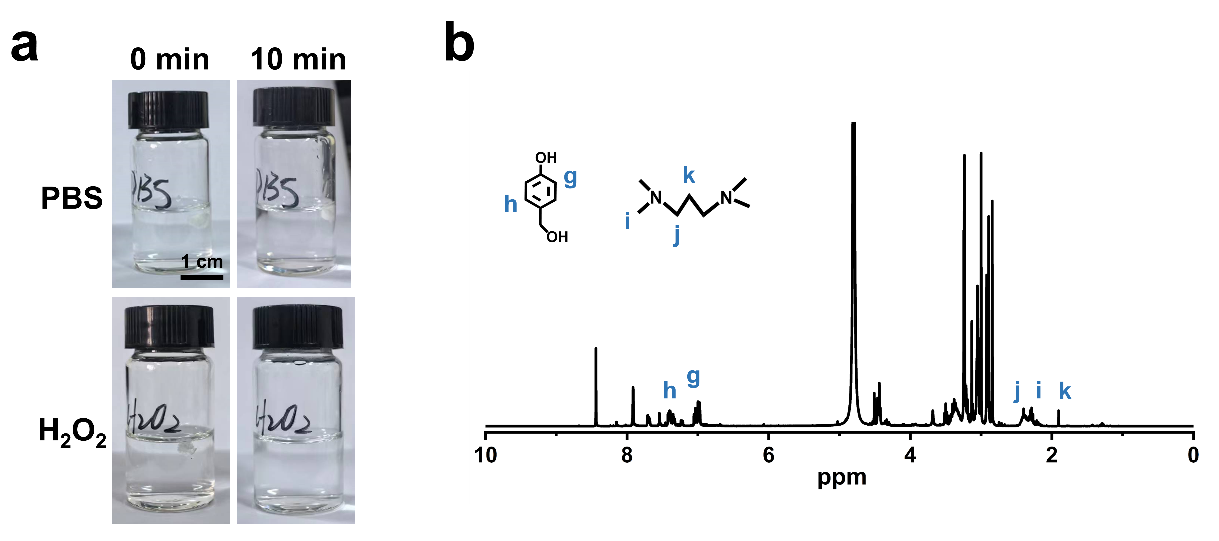


**Figure S12.** a) The pictures of PVA-TSPBA gels in PBS or H2O2. b) 1H-NMR (300 MHz, in D2O) of PVA-TSPBA gels after oxidation in H2O2 for 10 min.


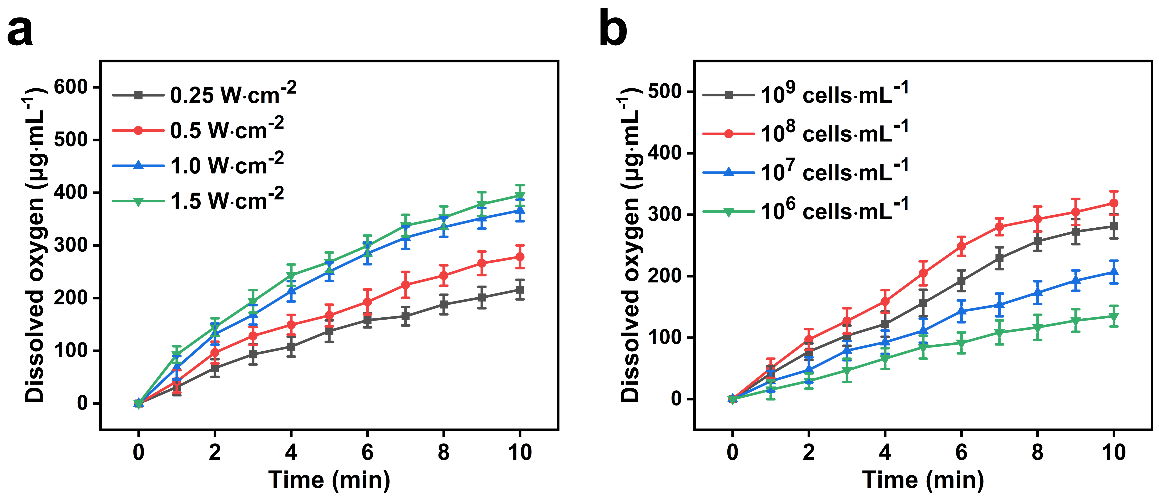


**Figure S13.** a) Releasing dissolved O2 of CUCBD under NIR irradiation with different power densities. b) Releasing dissolved O2 of CUCBD with different concentrations. Data are means ± s.d. (n = 3).


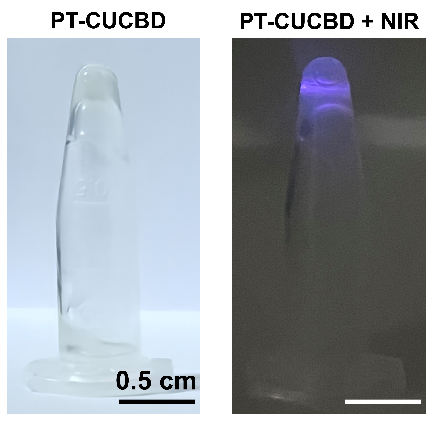


**Figure S14.** The pictures of PT-CUCBD with or without NIR.


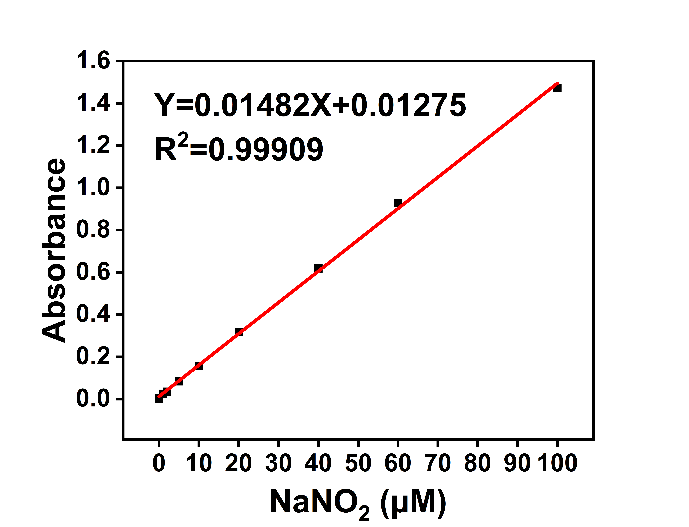


**Figure S15.** Standard work curve of NaNO2.


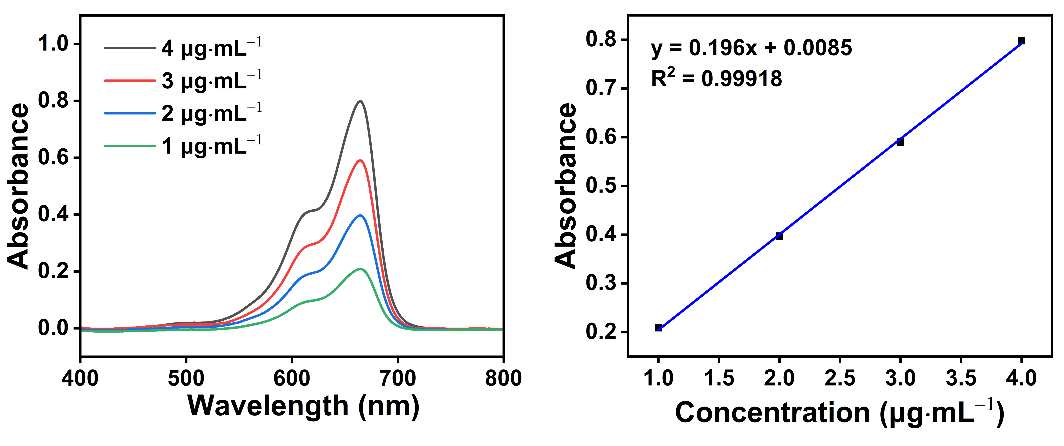


**Figure S16.** UV-visible spectra and standard work curve of methylene blue.


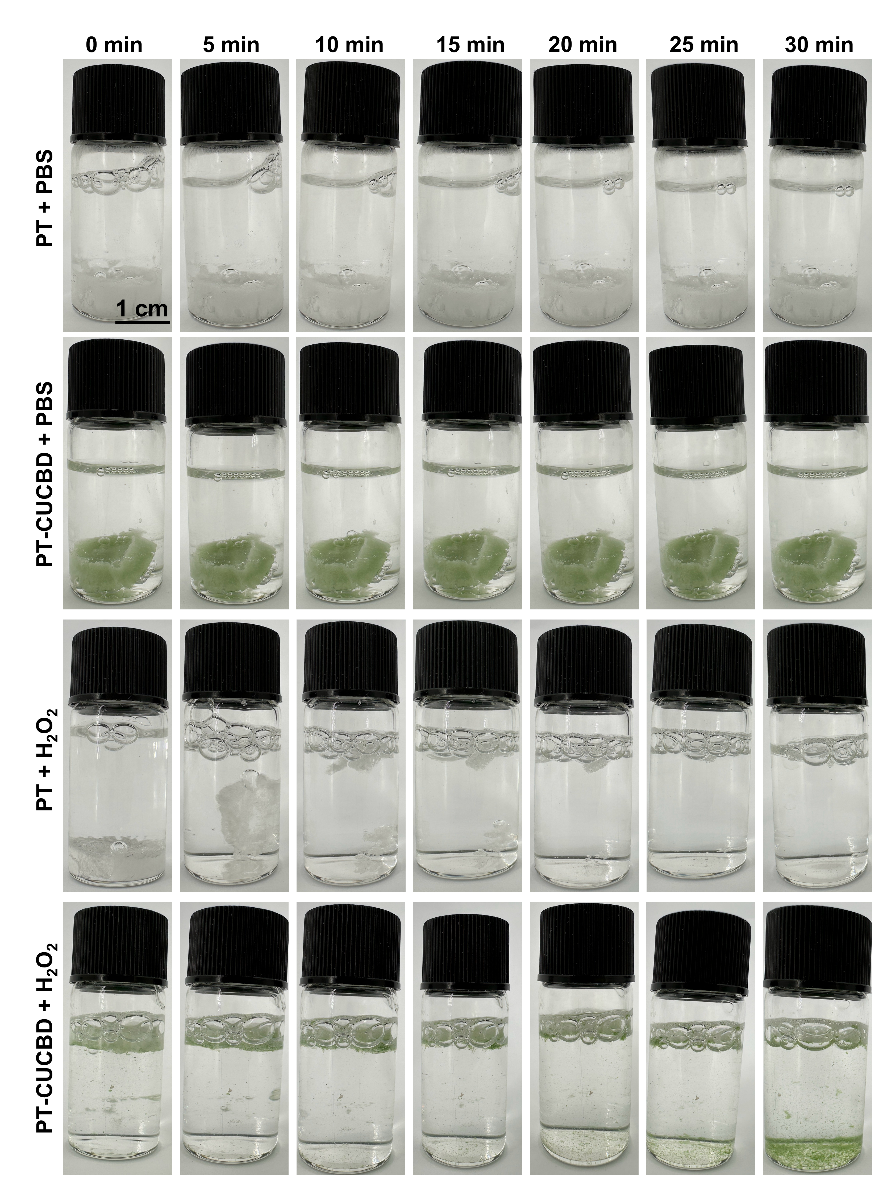


**Figure S17.** The pictures of PT and PT-CUCBD in PBS or H2O2.


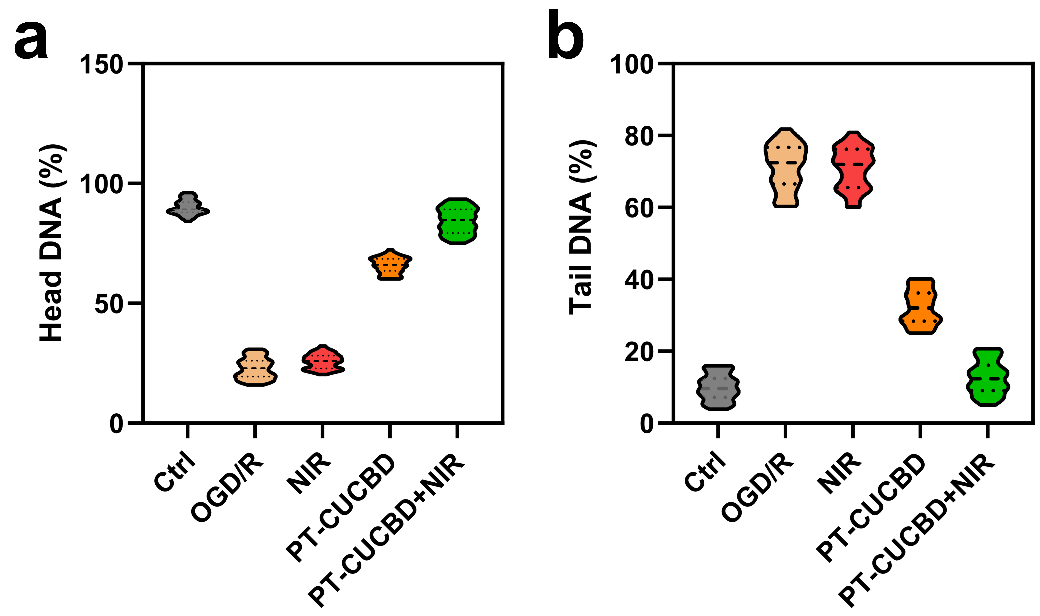


**Figure S18.** a) Percentage of DNA in the comet head. b) Percentage of DNA in the comet tail. Data are means ± s.d. (n = 50).


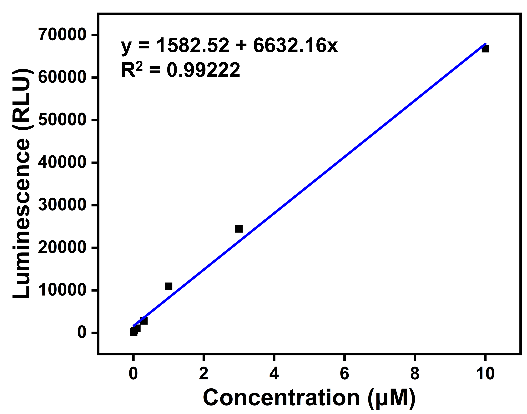


**Figure S19.** Standard curve of ATP.


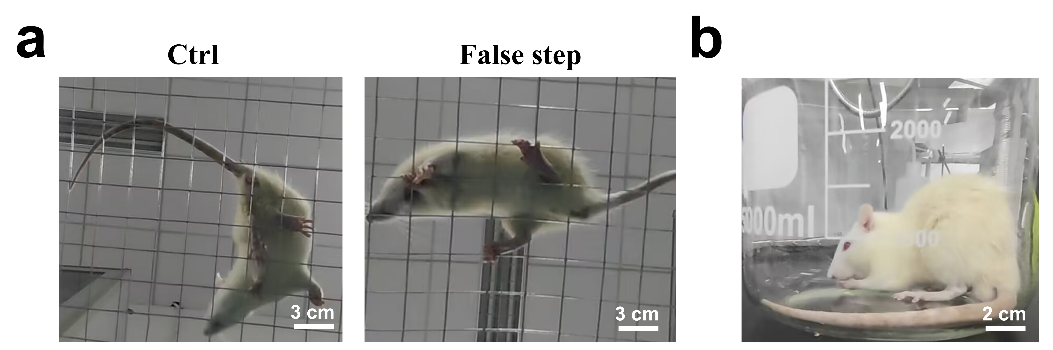


**Figure S20.** The pictures of (a) grid test and (b) adhesive test.


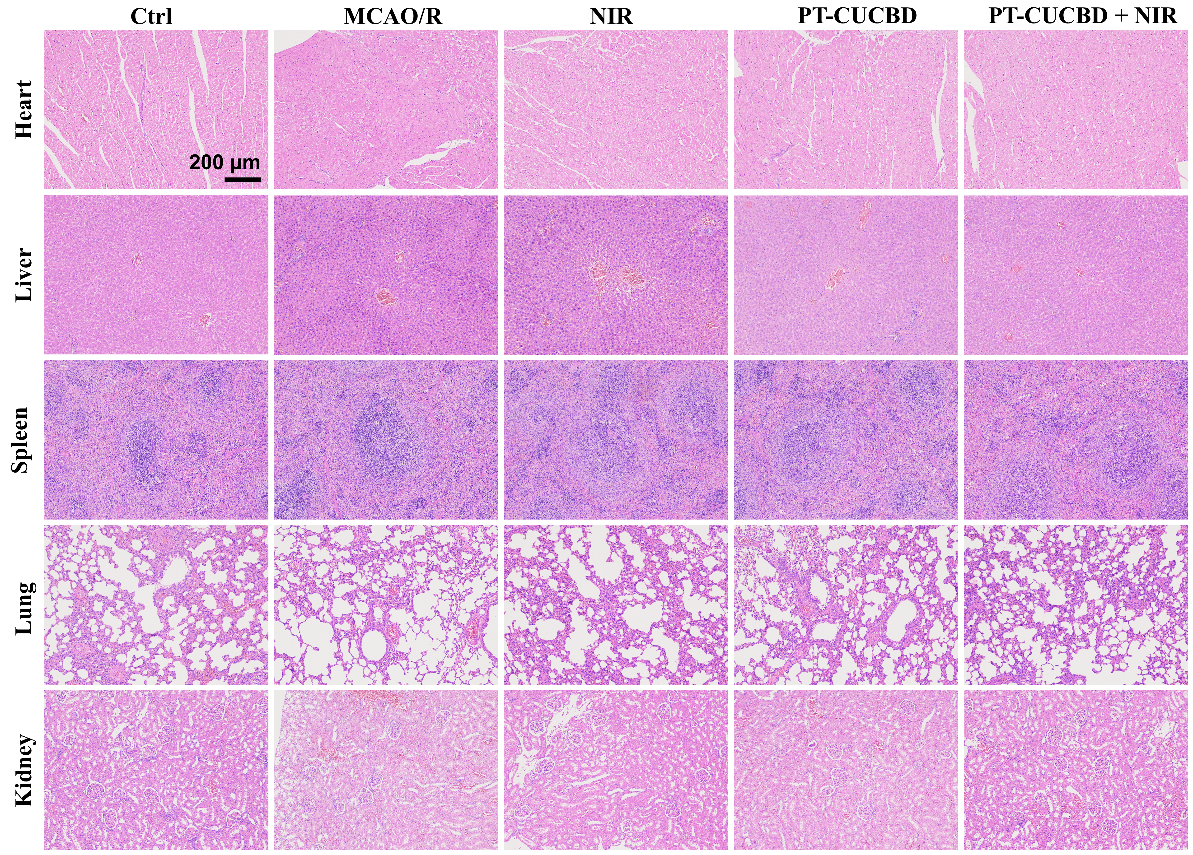


**Figure S21.** H&E staining images of the heart, liver, spleen, lung, and kidney of rats in different groups.

**Table S1.** Surface area, pore volume and pore size of COOH-UCM and UCMBD.

|  | COOH-UCM | UCBD |
| --- | --- | --- |
| BET Surface Area | 279.8022 m2·g−1 | 83.3619 m2·g−1 |
| Pore Volume | 0.797809 cm3·g−1 | 0.333501 cm3·g−1 |
| Pore Size | 16.0025 nm | 11.4053 nm |

**Table S2.** Bederson score.

|  | score |
| --- | --- |
| No observable neurological deficiency | 0 |
| Left forelimb affixing to chest with flexion | 1 |
| Circling to the left | 2 |
| Leaning to the left | 3 |
| Being unable to walk spontaneously and having a depressed level of consciousness | 4 |

**Table S3.** Longa score.

|  | score |
| --- | --- |
| No neurologic deficit | 0 |
| Failure to extend right forepaw fully | 1 |
| Circling to the right | 2 |
| Falling to the right | 3 |
| Did not walk spontaneously and had a depressed level of consciousness | 4 |
| Died | 5 |

**Table S4.** Modified neurological severity score (mNSS).

|  | Points |
| --- | --- |
| Motor tests |  |
| Raising rat by the tail | 3 |
| 1 Flexion of forelimb |  |
| 1 Flexion of hindlimb |  |
| 1 Head moved > 10° to vertical axis within 30 s |  |
| Placing rat on the floor (normal = 0; maximum = 3) | 3 |
| 0 Normal walk |  |
| 1 Inability to walk straight |  |
| 2 Circling toward the paretic side |  |
| 3 Fall down to the paretic side |  |
| Sensory tests | 2 |
| 1 Placing test (visual and tactile test) |  |
| 2 Proprioceptive test (deep sensation, pushing the paw against the table edge to stimulate limb muscles) |  |
| Beam balance tests (normal = 0; maximum = 6) | 6 |
| 0 Balances with steady posture |  |
| 1 Grasps side of beam |  |
| 2 Hugs the beam and one limb falls down from the beam |  |
| 3 Hugs the beam and two limbs fall down from the beam, or spins on beam (> 60 s) |  |
| 4 Attempts to balance on the beam but falls off (> 40 s) |  |
| 5 Attempts to balance on the beam but falls off (> 20 s) |  |
| 6 Falls off: No attempt to balance or hang on to the beam (> 20 s) |  |
| Reflexes absent and abnormal movements | 4 |
| 1 Pinna reflex (head shake when touching the auditory meatus) |  |
| 1 Corneal reflex (eye blink when lightly touching the cornea with cotton) |  |
| 1 Startle reflex (motor response to a brief noise from snapping a clipboard paper) |  |
| 1 Seizures, myoclonus, myodystony |  |
| Maximum points | 18 |

13 to 18 indicates severe injury; 7 to 12, moderate injury; 1 to 6, mild injury.

**Table S5.** GO analysis referred to Figure 10e.

| ID | Term | *p*-value | |
| --- | --- | --- | --- |
| GO:0001505 | regulation of neurotransmitter levels | 0.000000000000165 | | |
| GO:0006836 | neurotransmitter transport | 0.000000000005964 | | |
| GO:0007626 | locomotory behavior | 0.000000000074635 | | |
| GO:0007269 | neurotransmitter secretion | 0.000000145524229 | | |
| GO:0070997 | neuron death | 0.017455926766214 | | |
| GO:0055074 | calcium ion homeostasis | 0.010414190231537 | | |
| GO:1901214 | regulation of neuron death | 0.023260936460676 | | |
| GO:0007611 | learning or memory | 0.025492766368098 | | |
| GO:0051930 | regulation of sensory perception of pain | 0.000011765188202 | | |
| GO:0051931 | regulation of sensory perception | 0.000012916077032 | | |
| GO:0045211 | postsynaptic membrane | 0.000000001092229 |
| GO:0042734 | presynaptic membrane | 0.000000000389307 |
| GO:0150034 | distal axon | 0.000035261183821 |
| GO:0043679 | axon terminus | 0.000000129914468 |
| GO:0044306 | neuron projection terminus | 0.000000399380842 |
| GO:0034702 | ion channel complex | 0.000011737582477 |
| GO:1902495 | transmembrane transporter complex | 0.000180154672732 |
| GO:1990351 | transporter complex | 0.000307991044009 |
| GO:0030133 | transport vesicle | 0.001477175962278 |
| GO:0099572 | postsynaptic specialization | 0.004106740605834 |
| GO:0046873 | metal ion transmembrane transporter activity | 0.00000013676270 |
| GO:0015267 | channel activity | 0.00000057471679 |
| GO:0022803 | passive transmembrane transporter activity | 0.00000057471679 |
| GO:0005216 | monoatomic ion channel activity | 0.00000064749304 |
| GO:0022839 | monoatomic ion gated channel activity | 0.00000038814366 |
| GO:0022836 | gated channel activity | 0.00000043609809 |
| GO:0005261 | monoatomic cation channel activity | 0.00009369944477 |
| GO:0015081 | sodium ion transmembrane transporter activity | 0.00000081493229 |
| GO:0022853 | active monoatomic ion transmembrane transporter activity | 0.00002080261289 |
| GO:0022804 | active transmembrane transporter activity | 0.00205260333701 |

**Table S6**. KEGG pathways enrichment analysis referred to Figure 10f.

| ID | Term | *p*-value |
| --- | --- | --- |
| rno04080 | Neuroactive ligand-receptor interaction | 0.000000004350585 |
| rno04020 | Calcium signaling pathway | 0.000824124123163 |
| rno04310 | Wnt signaling pathway | 0.032310422989611 |
| rno04024 | cAMP signaling pathway | 0.090982874665467 |
| rno04390 | Hippo signaling pathway | 0.071181408659887 |
| rno04022 | cGMP-PKG signaling pathway | 0.219074069987260 |
| rno04015 | Rap1 signaling pathway | 0.354193082049417 |
| rno04151 | PI3K-Akt signaling pathway | 0.733800516523618 |
| rno04912 | GnRH signaling pathway | 0.134102859854300 |
| rno04370 | VEGF signaling pathway | 0.197232544040050 |
| rno04658 | Th1 and Th2 cell differentiation | 0.358659258360920 |
| rno04659 | Th17 cell differentiation | 0.433384846379750 |
| rno04668 | TNF signaling pathway | 0.475974757673093 |
| rno04750 | Inflammatory mediator regulation of TRP channels | 0.480588424474018 |
| rno04068 | FoxO signaling pathway | 0.567441633209725 |
| rno04062 | Chemokine signaling pathway | 0.731784303737746 |
| rno05208 | Chemical carcinogenesis - reactive oxygen species | 0.847264649005072 |
| rno04216 | Ferroptosis | 0.450298480504053 |
| rno04657 | IL-17 signaling pathway | 0.731342807904073 |
| rno04620 | Toll-like receptor signaling pathway | 0.735172832081303 |
| rno04350 | TGF-beta signaling pathway | 0.792581769607542 |
| rno04722 | Neurotrophin signaling pathway | 0.820388808819951 |
| rno04621 | NOD-like receptor signaling pathway | 0.925611446283670 |
| rno04144 | Endocytosis | 0.980536968552590 |

**Table S7**. Routine blood tests of rats in different groups.

|  | Normal Range | Ctrl | Mcao/R | NIR | PT-CUCBD | PT-CUCBD + NIR |
| --- | --- | --- | --- | --- | --- | --- |
| WBC | 2.9-15.3 (109/L) | 5.4 | 6.9 | 5.8 | 8.4 | 9.1 |
| Lymph | 2.6-13.5 (109/L) | 8.9 | 7.5 | 9.5 | 11.2 | 10.5 |
| Mon | 0.0-0.5 (109/L) | 0.2 | 0.3 | 0.2 | 0.1 | 0.3 |
| Gran | 0.4-3.2 (109/L) | 1.5 | 2.0 | 1.8 | 1.6 | 2.3 |
| Lymp % | 63.7-90.1 (%) | 80.9 | 66.5 | 70.5 | 82.3 | 81.9 |
| Gran % | 7.3-30.1 (%) | 19.5 | 8.9 | 20.6 | 10.5 | 15.6 |
| RBC | 5.6-7.89 (1012/L) | 6.05 | 6.52 | 7.12 | 6.14 | 7.36 |
| HCT | 36-46 (%) | 38.6 | 45.2 | 41.2 | 39.3 | 42.5 |
| MCV | 53-68.8 (fl) | 55.6 | 58.9 | 61.4 | 65.3 | 61.5 |
| MCH | 16-23.1 (pg) | 18.2 | 17.3 | 21.2 | 22.2 | 20.3 |
| RDW | 11-15.5 (%) | 12.3 | 12.6 | 13.6 | 12.5 | 14.2 |
| PLT | 100-1610 (109/L) | 588 | 1063 | 985 | 1236 | 1354 |
| PDW |  | 17.2 | 16.5 | 16.3 | 16.4 | 16.5 |
